# Supplementary material for: Identification of Yeast Transcriptional Regulation Networks Using Multivariate Random Forests
Source: PubMed Central journal article supplement (PMC2691601; doi:10.1371/journal.pcbi.1000414), 2009-06-19
Supplement: pcbi.1000414.s001.pdf [file pcbi.1000414.s001.pdf]

# Supporting Data: Identifying regulatory networks using multivariate random forest

Yuanyuan Xiao

Mark R. Segal

January 28, 2009

Department of Epidemiology and Biostatistics,  
Center for Bioinformatics and Molecular Biostatistics,  
University of California, 185 Berry Street, Lobby 4, Suite 5700,  
San Francisco, CA 94107, USA.

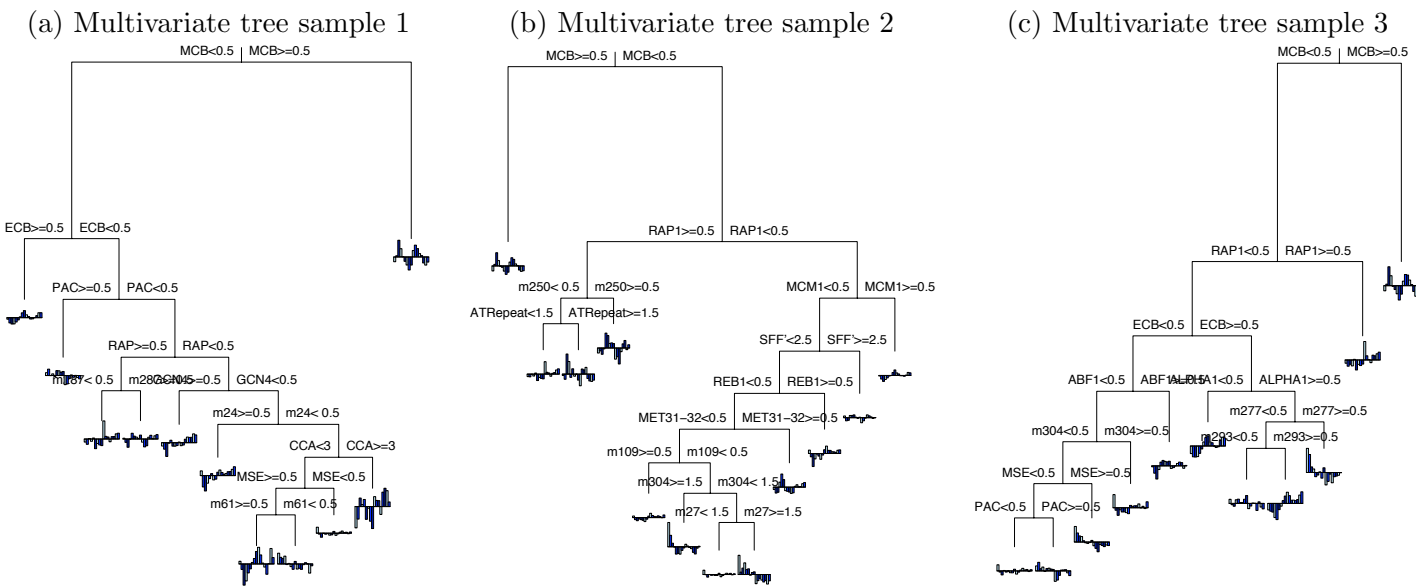

Figure 1: (a-c) Multivariate trees built using 2/3 of samples to highlight the instability of a single tree.

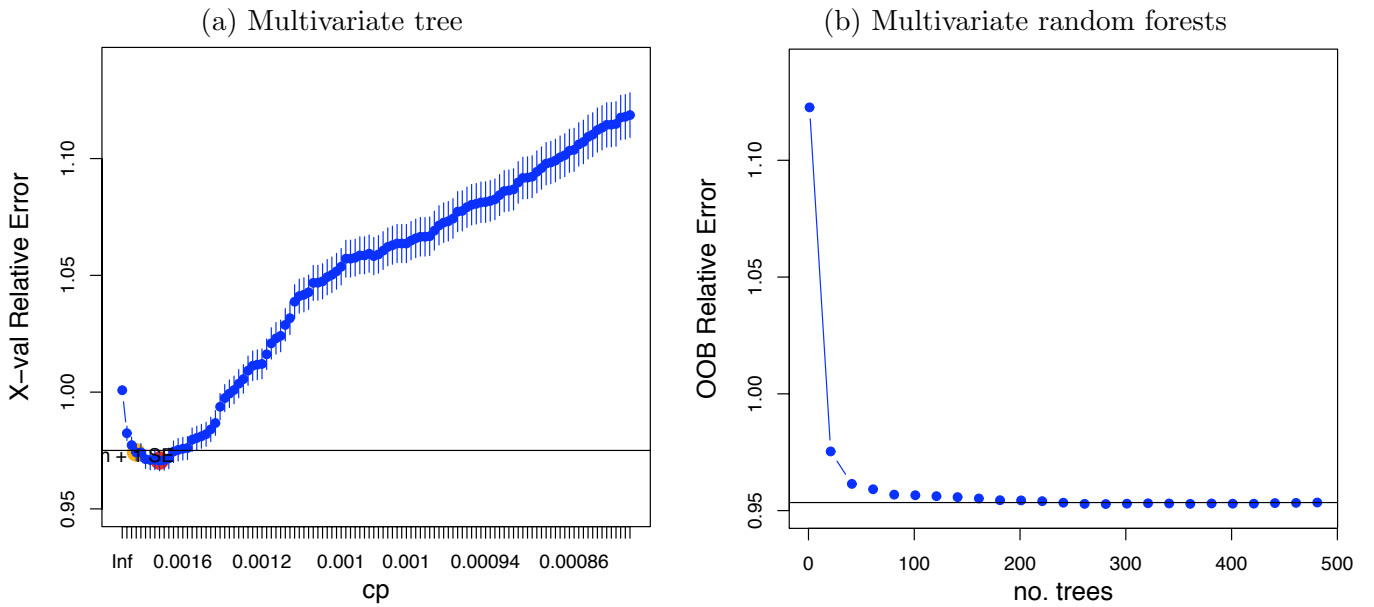

Figure 2: Prediction performance comparison between a single multivariate tree and multivariate random forests.

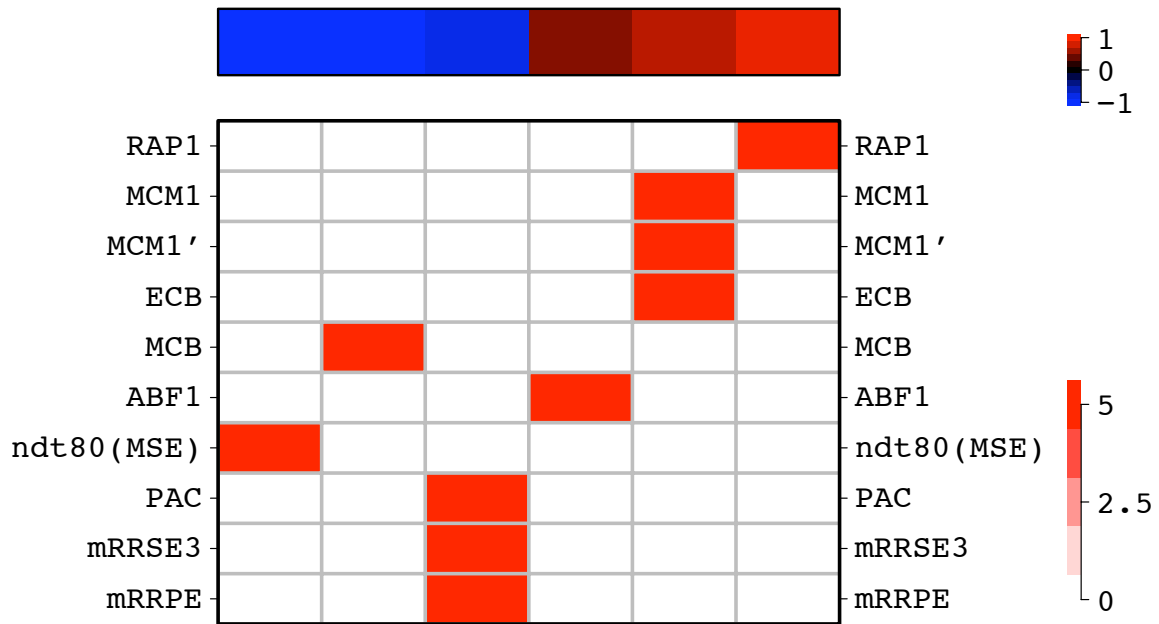

Figure 3: RCs of cell cycle derived using the 1st PC from PCA analysis of the expression matrix as the response variable. The top section of the graph shows the average scores of the genes in the RC. The bottom section depicts signature motifs in the corresponding RC. The color red indicates enrichment  $-\log_{10}p$ -values by a Chi-square test of association; the color blue corresponds to the depletion  $-\log_{10}p$ -values. The color bar at the lower right hand side is in  $-\log_{10}p$ - scale and the color signals the direction of the tes

Table 1: Top 10 importance measures for each time point identified by URF.

| 0min  | 10min   | 20min   | 30min   | 40min    | 50min    | 60min    | 70min   | 80min  |
|-------|---------|---------|---------|----------|----------|----------|---------|--------|
| SFF'  | SFF'    | MCB     | MCB     | SFF      | SFF      | SFF'     | MCB     | MCB    |
| SFF   | SFF     | SFF'    | MCM1'   | SFF'     | SFF'     | MCB      | MCM1    | SFF'   |
| MCB   | ALPHA1' | SFF     | MCM1    | MCM1'    | RAP1     | SFF      | MCM1'   | MCM1   |
| m304  | ABF1    | SCB     | MSE     | ECB      | SWI5     | PAC      | ECB     | RAP1   |
| ECB   | m285    | ABF1    | m90     | m27      | m310     | MCM1'    | SFF     | SFF    |
| MCM1' | ALPHA1  | m320    | ECB     | m304     | MET31-32 | m304     | ALPHA1' | ECB    |
| m190  | PAC     | MCM1'   | SFF'    | MET31-32 | m304     | mRRPE    | SFF'    | MCM1'  |
| MCM1  | MSE     | m90     | SFF     | MCM1     | ABF1     | ALPHA1'  | m304    | SWI5   |
| ABF1  | m310    | ALPHA1' | MIG1    | MIG1     | MCM1'    | ABF1     | ALPHA1  | SCB    |
| m310  | Ume6    | m252    | RPN4    | m293     | m254     | MCM1     | SCB     | CCA    |
|       | 90min   | 100min  | 110min  | 120min   | 130min   | 140min   | 150min  | 160min |
|       | RAP1    | MCB     | MCB     | SFF'     | SFF'     | MCB      | MCB     | MCB    |
|       | SFF     | PAC     | MSE     | mRRPE    | SFF      | SFF'     | SFF'    | m304   |
|       | SWI5    | SWI5    | MCM1'   | SFF      | MCM1'    | m293     | SFF     | SFF'   |
|       | SFF'    | SFF     | SFF'    | MCM1     | m260     | SFF      | ECB     | SFF    |
|       | m304    | ALPHA1' | m218    | ALPHA1'  | ALPHA1'  | m310     | MCM1'   | MCM1'  |
|       | MCB     | SFF'    | m193    | RAP1     | m314     | ALPHA1'  | GCN4    | SCB    |
|       | ALPHA1' | ALPHA1  | m293    | m289     | m287     | m57      | m310    | m271   |
|       | MCM1    | MSE     | ALPHA1' | ALPHA2   | m289     | m285     | m133    | PAC    |
|       | ECB     | Ume6    | SFF     | ECB      | MCM1     | m_LFTE17 | m293    | RAP1   |
|       | STRE'   | m293    | ECB     | m293     | m105     | CCA      | SCB     | m310   |

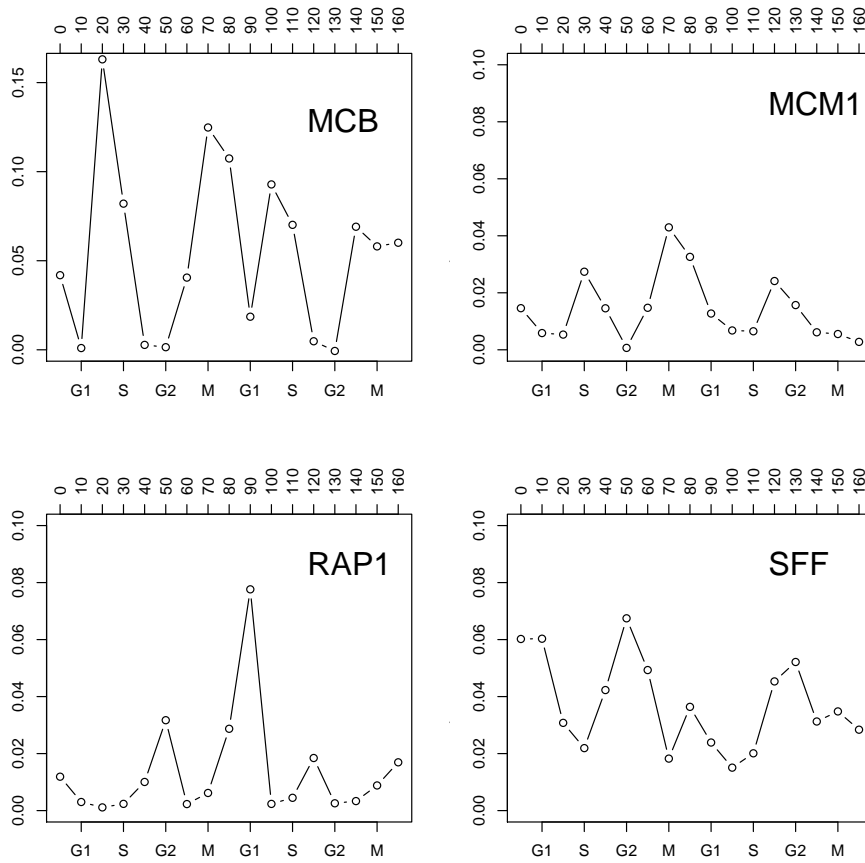

Figure 4: Normalized variable importance measures for MCB, MCM1, RAP1 and SFF' derived by applying univariate random forests for each time point of the yeast cell cycle data by Cho *et al.*. Variable importance measures for each motif at each time points is normalized by dividing the sum of variable importance measures for all motifs in that specific time point.

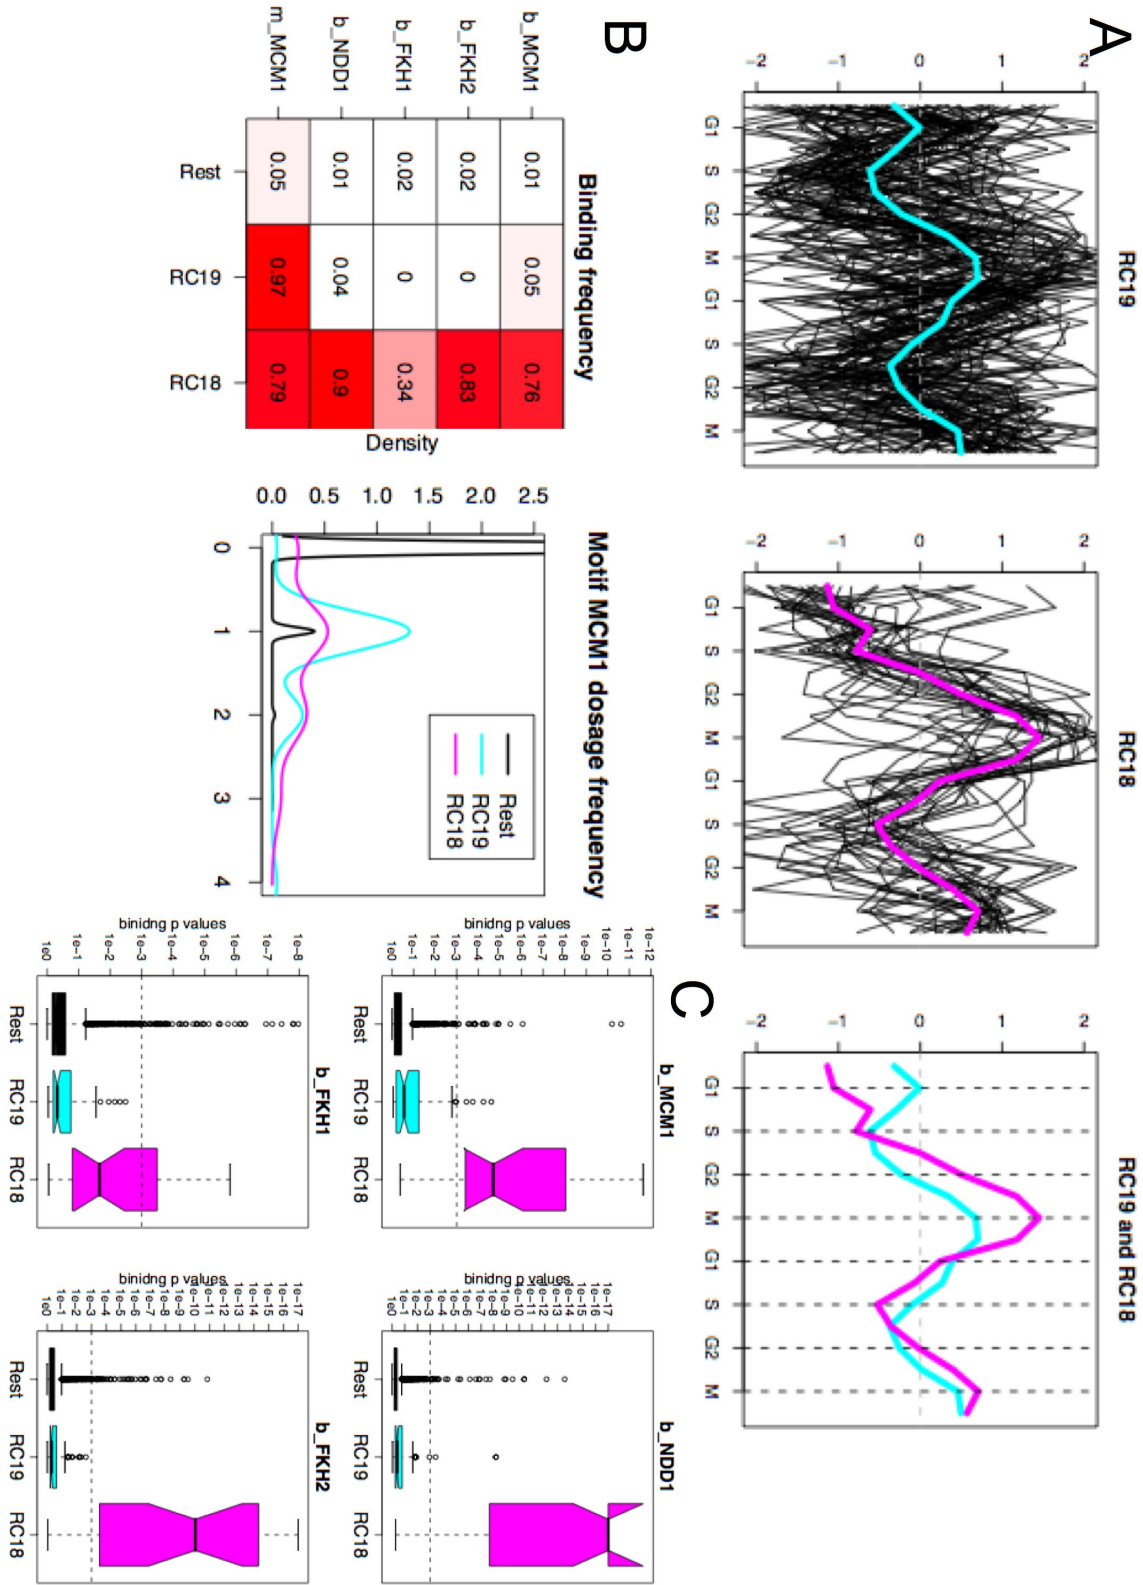

Figure 5: Comparisons of RC18 and RC19 uncovered in yeast cell cycle data by Cho *et al.* using both motifs and TF-binding as predictors. A) Expression profiles of constituent genes. B) Left: binding and motif frequency of feature regulons in the two RCs; Right: MCM1 motif dosages in the two RCs. C) Boxplots of binding p-values of the four binding TFs comparing RC18, RC19 and the rest of the genes.

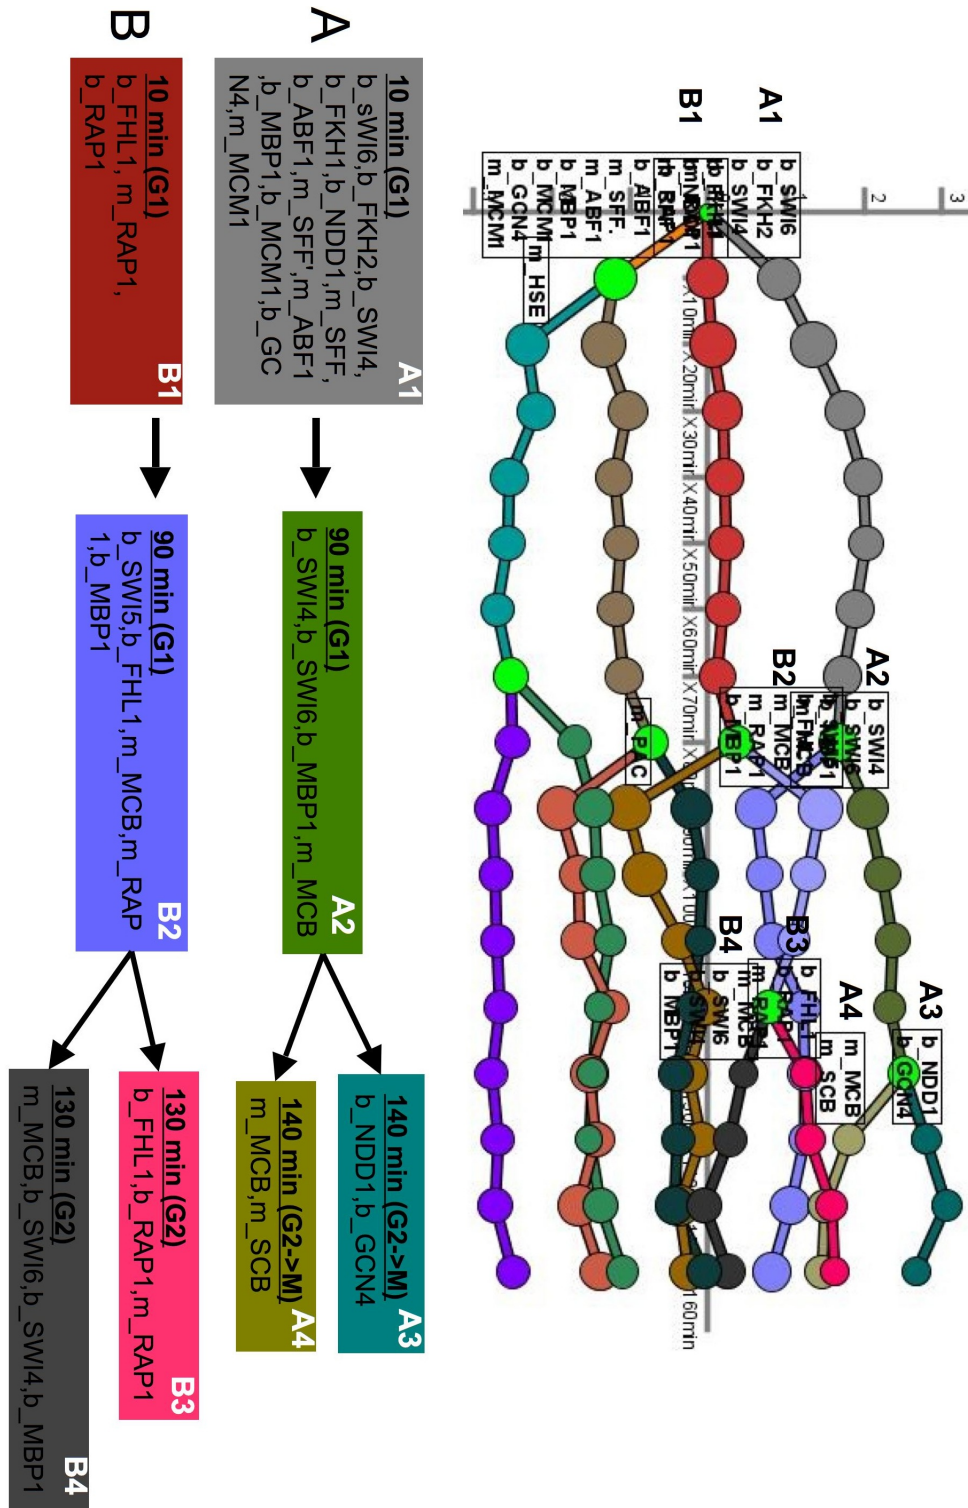

Figure 6: Dynamic regulatory map for yeast response to cell cycle (Cho *et al.*) derived using DREM (<http://www.sb.cs.cmu.edu/drem>). To facilitate interpretation, labeled TFs associated with their respective nodes are presented in a flow chart format in the lower panel. TF boxes from upper and lower panels were matched by their numbers A1-A4 and B1-B4.

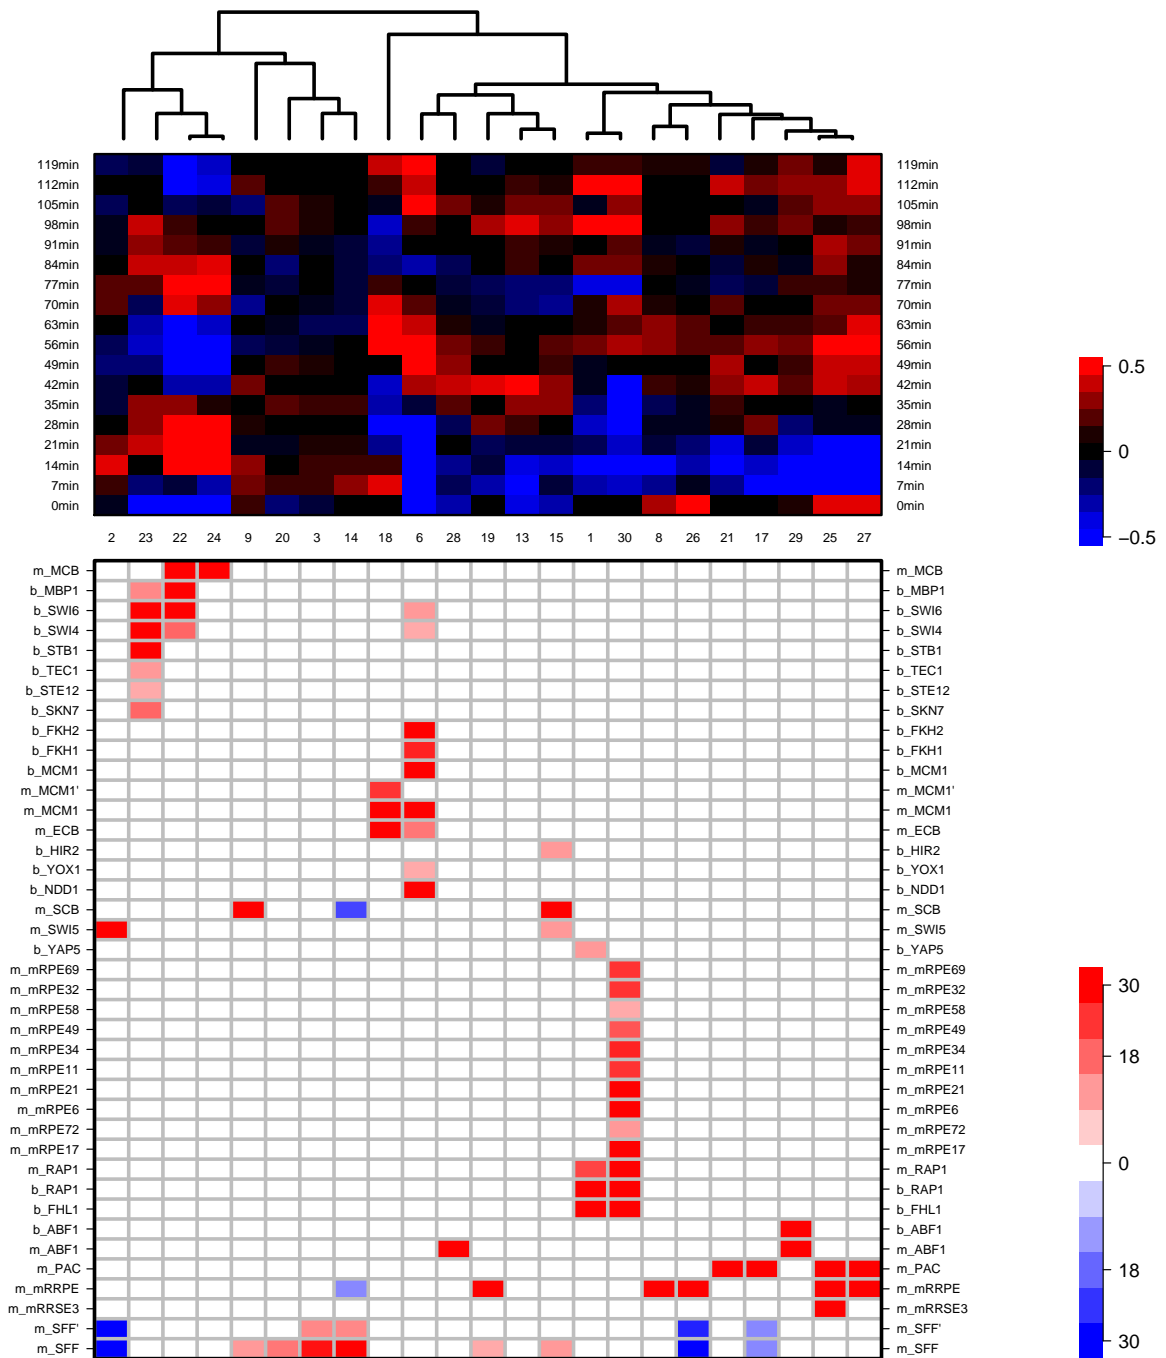

Figure 7: RC diagram of the cell cycle data by Spellman *et al.* using both motifs and TF-binding as predictors. The top section of the graph shows the average expression profile of the genes in a specific RC, which is clustered based on Pearson correlation and average linkage. The bottom section depicts signature regulons in the corresponding RC. Motif regulons have the “m\_” prefix whereas TF-binding regulons have the “b\_” prefix. The color red indicates enrichment  $-\log_{10}p$  values by a Chi-square test of association; the color blue corresponds to the depletion  $-\log_{10}p$  values.

| %<br>in common         |                                        | Cho <i>et al.</i> |                                   |                |                                        |                                  |
|------------------------|----------------------------------------|-------------------|-----------------------------------|----------------|----------------------------------------|----------------------------------|
|                        |                                        | RC6<br>(MCB)      | RC20<br>(Mbp1,Swi4,<br>Swi6,Stb1) | RC19<br>(MCM1) | RC18<br>(MCM1,<br>Fkh1,Fkh2,Ndd1,Mcm1) | RC16<br>(RAP1,RPE,Ra<br>p1,Fhl1) |
| Spellman <i>et al.</i> | RC24 (MCB)                             | 94                | 0                                 | 0              | 0                                      | 0                                |
|                        | RC22/23<br>(Mbp1,Swi4,<br>Swi6)        | 1                 | 82                                | 0              | 4                                      | 4                                |
|                        | RC18<br>(MCM1)                         | 0                 | 0                                 | 71             | 11                                     | 0                                |
|                        | RC6 (MCM1,<br>Fkh1,Fkh2,N<br>dd1,Mcm1) | 0                 | 0                                 | 0              | 71                                     | 0                                |
|                        | RC1/30<br>(RAP1,RPE,<br>Rap1,Fhl1)     | 0                 | 0                                 | 0              | 0                                      | 82                               |

Figure 8: Tabulation of percentage of common genes between select RCs derived from two independent cell cycle data (Spellman *et al.* and Cho *et al.*).

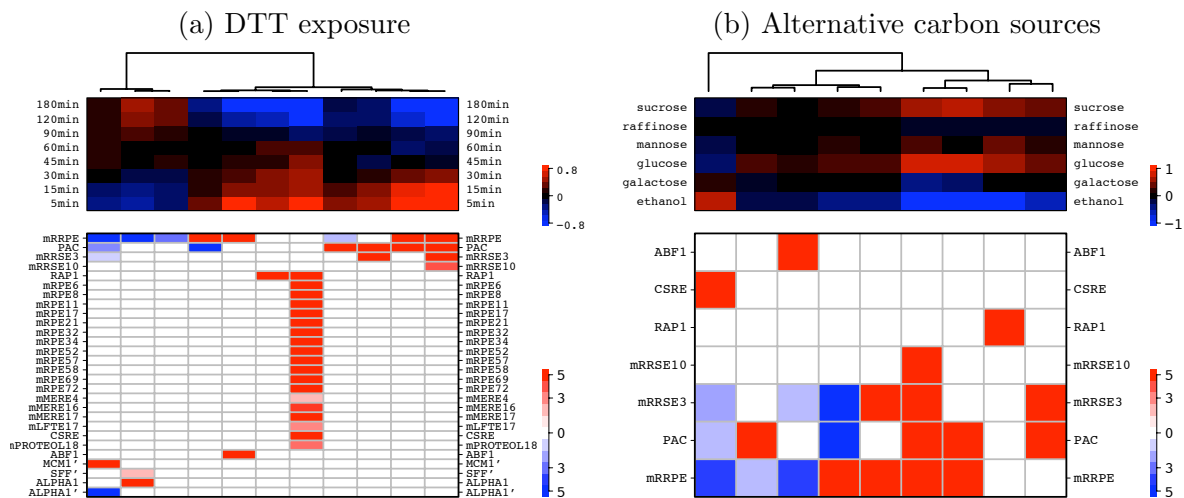

Figure 9: RC diagrams for (a) DTT exposure and (b) alternative carbon sources. The top section shows that dendrogram of hierarchical clustering of the average expression profiles within each RC based on Pearson correlation and average linkage. The bottom section depicts signature motifs in the corresponding RC. The color red indicates enrichment  $-\log_{10}p$ -values by a Chi-square test of association; the color blue corresponds to the depletion  $-\log_{10}p$ -values. The color bar at the lower right hand side is in  $-\log_{10}p$ - scale and the color signals the direction of the test



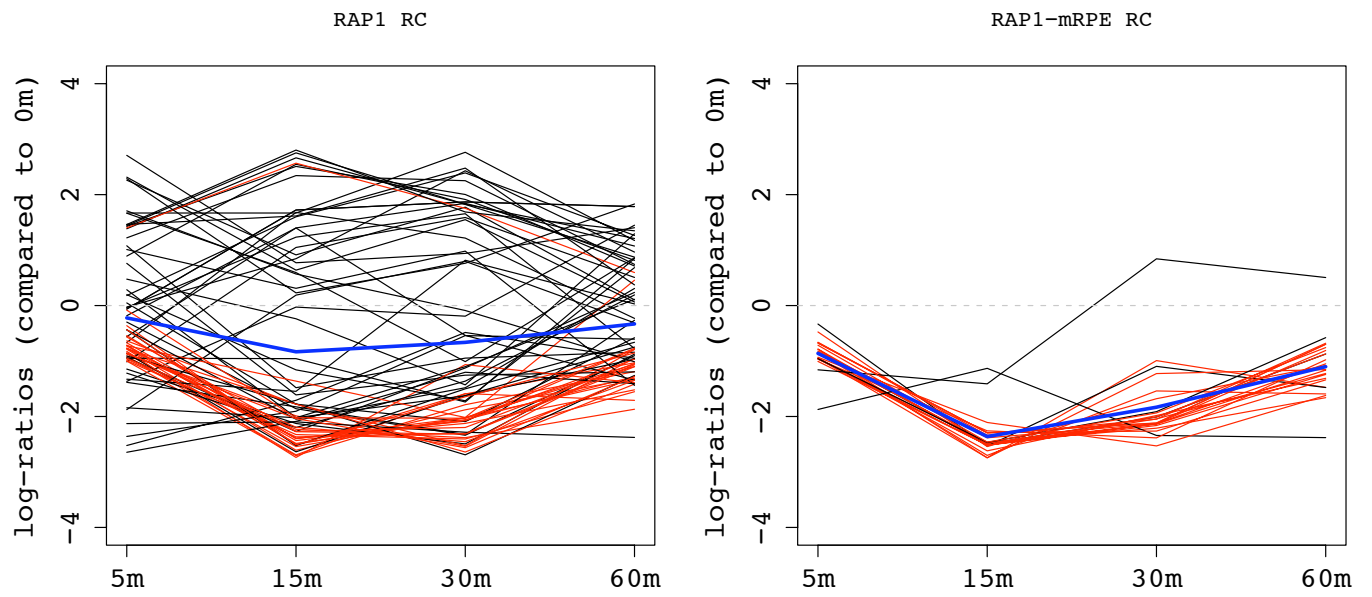

Figure 10: Expression traces of target genes in RAP1 RC (left) and RAP1-mRPE RC (right) of the heat shock data. Traces in red are ribosomal protein genes. The blue lines are average RC expression profiles.
